# Supplementary material for: Dietary Fiber in Bilberry Ameliorates Pre-Obesity Events in Rats by Regulating Lipid Depot, Cecal Short-Chain Fatty Acid Formation and Microbiota Composition
Source: PubMed Central journal article supplement (PMC6627426; doi:10.3390/nu11061350), 2019-06-15
Supplement: nutrients-11-01350-s001.pdf [file nutrients-11-01350-s001.pdf]

**Table S1.** Primers used for Real-Time qPCR

| mRNA                           | Forward primer         | Reverse primer         |
|--------------------------------|------------------------|------------------------|
| <i>Acc</i>                     | GGACAACACCTGTGTGGTAGAA | CGTGGGGATGTTCCCTCT     |
| <i>Cpt1<math>\alpha</math></i> | ACAATGGGACATTCCAGGAG   | AAAGACTGGCGCTGCTCA     |
| <i>Fabp5</i>                   | TGCACCTTGGGAGAGAAGTT   | AAGGTGCAGACCGTCTCAGT   |
| <i>Fasn</i>                    | GGCATCATTGGGCACTCCTT   | GCTGCAAGCACAGCCTTCTCT  |
| <i>Mttp</i>                    | GCGAGTCTAAAACCCGAGTG   | CACTGTGATGTCGCTGGTTATT |
| <i>Ppara</i>                   | TGCGGACTACCAGTACTTAGGG | GCTGGAGAGAGGGTGTCTGT   |
| <i>Ppar<math>\gamma</math></i> | TCCTCCTGTTGACCCAGAGCAT | AGCTGATTCCGAAGTTGGTGG  |
| <i>Scd-1</i>                   | GAAGCGAGCAACCGACAG     | GGTGGTCGTGTAGGAACTGG   |
| <i>Tfllb</i>                   | CCTGGCAGGAGTCCTATCTCT  | ACCAGCAATATCCCCGATT    |
| <i>Ucp-1</i>                   | GCCTGCCTAGCAGACATCAT   | TGGCCTTCACCTTGGATCT    |

**Table S2.** Cecal pools of SCFAs, lactic and succinic acid ( $\mu\text{mol}$ ) and serum concentration ( $\mu\text{mol/L}$ ) of SCFAs in rats fed experimental diets (means  $\pm$  SEM, n = 6).

| Cecum ( $\mu\text{mol}$ )   | LFD                        | HFD                      | LFD+BB                    | HFD+BB                     | Bilberry | HF     | BB&HF |
|-----------------------------|----------------------------|--------------------------|---------------------------|----------------------------|----------|--------|-------|
| Total                       | 138 $\pm$ 28 <sup>bc</sup> | 78 $\pm$ 7 <sup>c</sup>  | 280 $\pm$ 48 <sup>a</sup> | 190 $\pm$ 18 <sup>ab</sup> | <0.001   | 0.006  | 0.620 |
| Acetic acid                 | 90 $\pm$ 17 <sup>bc</sup>  | 51 $\pm$ 4 <sup>c</sup>  | 214 $\pm$ 38 <sup>a</sup> | 135 $\pm$ 12 <sup>ab</sup> | <0.001   | 0.008  | 0.340 |
| Propionic acid              | 21 $\pm$ 5 <sup>a</sup>    | 7 $\pm$ 1 <sup>b</sup>   | 25 $\pm$ 3 <sup>a</sup>   | 16 $\pm$ 2 <sup>ab</sup>   | 0.021    | <0.001 | 0.390 |
| Butyric acid                | 13 $\pm$ 3 <sup>ab</sup>   | 7 $\pm$ 0 <sup>b</sup>   | 18 $\pm$ 3 <sup>a</sup>   | 19 $\pm$ 3 <sup>a</sup>    | 0.001    | 0.320  | 0.190 |
| Caproic acid                | 0.2 $\pm$ 0 <sup>ab</sup>  | 0.1 $\pm$ 0 <sup>b</sup> | 0.2 $\pm$ 0 <sup>a</sup>  | 0.2 $\pm$ 0 <sup>a</sup>   | 0.001    | 0.440  | 0.480 |
| Succinic acid               | 3 $\pm$ 1 <sup>b</sup>     | 7 $\pm$ 1 <sup>ab</sup>  | 11 $\pm$ 3 <sup>a</sup>   | 12 $\pm$ 1 <sup>a</sup>    | <0.001   | 0.054  | 0.110 |
| Valeric acid                | 3.2 $\pm$ 0 <sup>a</sup>   | 0.9 $\pm$ 0 <sup>b</sup> | 2.6 $\pm$ 0 <sup>ab</sup> | 1.2 $\pm$ 0 <sup>b</sup>   | 0.690    | <0.001 | 0.300 |
| Iso-butyric acid            | 2 $\pm$ 0 <sup>a</sup>     | 1 $\pm$ 0 <sup>a</sup>   | 1 $\pm$ 0 <sup>a</sup>    | 1 $\pm$ 0 <sup>a</sup>     | 0.150    | 0.063  | 0.150 |
| Iso-valeric acid            | 3 $\pm$ 1 <sup>a</sup>     | 2 $\pm$ 0 <sup>a</sup>   | 1 $\pm$ 0 <sup>a</sup>    | 1 $\pm$ 0 <sup>a</sup>     | 0.087    | 0.240  | 0.240 |
| Heptanoic acid              | 0.1 $\pm$ 0 <sup>a</sup>   | 0.1 $\pm$ 0 <sup>a</sup> | 0.2 $\pm$ 0 <sup>a</sup>  | 0.1 $\pm$ 0 <sup>a</sup>   | 0.077    | 0.150  | 0.290 |
| Lactic acid                 | 3 $\pm$ 1 <sup>a</sup>     | 3 $\pm$ 1 <sup>a</sup>   | 6 $\pm$ 1 <sup>a</sup>    | 4 $\pm$ 1 <sup>a</sup>     | 0.190    | 0.690  | 0.270 |
| Serum ( $\mu\text{mol/L}$ ) | LFD                        | HFD                      | LFD+BB                    | HFD+BB                     | Bilberry | Fat    | BB&HF |
| Total                       | 705 $\pm$ 201              | 808 $\pm$ 126            | 1150 $\pm$ 264            | 990 $\pm$ 214              | 0.2      | 0.9    | 0.6   |
| Acetic acid                 | 552 $\pm$ 155              | 701 $\pm$ 107            | 874 $\pm$ 171             | 816 $\pm$ 162              | 0.2      | 0.5    | 0.5   |
| Propionic acid              | 107 $\pm$ 37               | 64 $\pm$ 17              | 218 $\pm$ 86              | 124 $\pm$ 50               | 0.1      | 0.3    | 0.7   |
| Iso-butyric acid            | 9 $\pm$ 1                  | 9 $\pm$ 1                | 11 $\pm$ 3                | 8 $\pm$ 2                  | 0.8      | 0.6    | 0.7   |
| Butyric acid                | 19 $\pm$ 5                 | 19 $\pm$ 4               | 27 $\pm$ 6                | 29 $\pm$ 6                 | 0.07     | 0.4    | 0.9   |
| Iso-valeric acid            | 15 $\pm$ 3                 | 13 $\pm$ 2               | 13 $\pm$ 2                | 10 $\pm$ 3                 | 0.4      | 0.5    | 0.9   |
| Valeric acid                | 6 $\pm$ 2                  | 5 $\pm$ 2                | 8 $\pm$ 3                 | 4 $\pm$ 2                  | 0.9      | 0.2    | 0.6   |

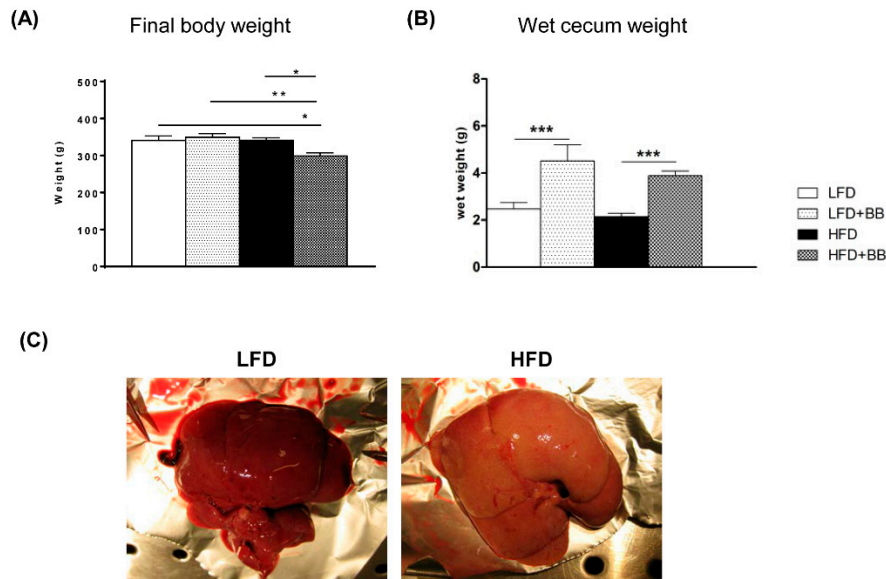

Figure S1. Final body weight, cecum weight and liver morphology.

| LFD                                         |      | HFD                                         |      |
|---------------------------------------------|------|---------------------------------------------|------|
| <i>Bacteroides</i>                          | 0.16 | <i>Clostridium</i>                          | 0.13 |
| <i>Akkermansia</i>                          | 0.05 | <i>Bacteroides</i>                          | 0.09 |
| <i>Clostridium</i>                          | 0.05 | <i>Peptostreptococcaceae Incertae Sedis</i> | 0.08 |
| <i>Parabacteroides</i>                      | 0.04 | <i>Escherichia-Shigella</i>                 | 0.08 |
| <i>Ruminococcaceae Incertae Sedis</i>       | 0.04 | <i>Parasutterella</i>                       | 0.05 |
| <i>Parasutterella</i>                       | 0.03 | <i>Parabacteroides</i>                      | 0.03 |
| <i>Lachnospiraceae Incertae Sedis</i>       | 0.02 | <i>Lachnospiraceae Incertae Sedis</i>       | 0.02 |
| <i>Peptostreptococcaceae Incertae Sedis</i> | 0.02 | <i>Bifidobacterium</i>                      | 0.01 |
| <i>Anaerotruncus</i>                        | 0.01 | <i>Ruminococcaceae Incertae Sedis</i>       | 0.01 |
| <i>Family XIII Incertae Sedis</i>           | 0.01 | <i>Anaerotruncus</i>                        | 0.01 |
| <i>Lactobacillus</i>                        | 0.01 | <i>Allobaculum</i>                          | 0.01 |
| <i>Oscillibacter</i>                        | 0.01 | <i>Erysipelotrichaceae Incertae Sedis</i>   | 0.01 |
| <i>Erysipelotrichaceae Incertae Sedis</i>   | 0.01 | <i>Family XIII Incertae Sedis</i>           | 0.01 |
| <i>Marvinbryantia</i>                       | 0.01 |                                             |      |

  

| LFD+BB                                    |      | HFD+BB                                |      |
|-------------------------------------------|------|---------------------------------------|------|
| <i>Bacteroides</i>                        | 0.24 | <i>Lachnospiraceae Incertae Sedis</i> | 0.08 |
| <i>Lachnospiraceae Incertae Sedis</i>     | 0.10 | <i>Bacteroides</i>                    | 0.07 |
| <i>Akkermansia</i>                        | 0.04 | <i>Blautia</i>                        | 0.04 |
| <i>Roseburia</i>                          | 0.04 | <i>Clostridium</i>                    | 0.04 |
| <i>Parabacteroides</i>                    | 0.03 | <i>Parasutterella</i>                 | 0.04 |
| <i>Ruminococcaceae Incertae Sedis</i>     | 0.02 | <i>Roseburia</i>                      | 0.04 |
| <i>Marvinbryantia</i>                     | 0.02 | <i>Ruminococcaceae Incertae Sedis</i> | 0.03 |
| <i>Blautia</i>                            | 0.02 | <i>Parabacteroides</i>                | 0.03 |
| <i>Subdoligranulum</i>                    | 0.01 | <i>Bifidobacterium</i>                | 0.02 |
| <i>Clostridium</i>                        | 0.01 | <i>Allobaculum</i>                    | 0.02 |
| <i>Parasutterella</i>                     | 0.01 | <i>Ruminococcus</i>                   | 0.02 |
| <i>Erysipelotrichaceae Incertae Sedis</i> | 0.01 | <i>Lactobacillus</i>                  | 0.01 |
| <i>Unknown Bacteroidaceae genus</i>       | 0.01 | <i>Marvinbryantia</i>                 | 0.01 |
|                                           |      | <i>Akkermansia</i>                    | 0.01 |

Figure S2: Top ranking genera in cecum microbiota in response to each diet
